# Supplementary material
Source: PubMed Central journal article supplement (PMC2782560)
Supplement: NIHMS147489-supplement-01.pdf [file NIHMS147489-supplement-01.pdf]

Supplemental Table. Log linear subtraction method for assessing dependency relationships of viral type (V), ganglion location (G), side (S), and positivity (P) in complete data set.

| Step (b) |                     |   | Effects                    | Chi-Square(a) | df | Sig.  | Number of Iterations |
|----------|---------------------|---|----------------------------|---------------|----|-------|----------------------|
| 0        | Generating Class(c) |   | V*G*S*P                    | .000          | 0  | .     |                      |
|          | Deleted Effect      | 1 | V*G*S*P                    | 3.845         | 7  | .797  | 3                    |
| 1        | Generating Class(c) |   | V*G*S, V*G*P, V*S*P, G*S*P | 3.845         | 7  | .797  |                      |
|          | Deleted Effect      | 1 | V*G*S                      | .303          | 7  | 1.000 | 3                    |
|          |                     | 2 | V*G*P                      | 10.142        | 7  | .181  | 3                    |
|          |                     | 3 | V*S*P                      | 1.195         | 1  | .274  | 3                    |
|          |                     | 4 | G*S*P                      | 6.172         | 7  | .520  | 3                    |
| 2        | Generating Class(c) |   | V*G*P, V*S*P, G*S*P        | 4.148         | 14 | .995  |                      |
|          | Deleted Effect      | 1 | V*G*P                      | 10.113        | 7  | .182  | 3                    |
|          |                     | 2 | V*S*P                      | 1.242         | 1  | .265  | 2                    |
|          |                     | 3 | G*S*P                      | 5.924         | 7  | .549  | 2                    |
| 3        | Generating Class(c) |   | V*G*P, V*S*P, G*S          | 10.072        | 21 | .978  |                      |
|          | Deleted Effect      | 1 | V*G*P                      | 10.309        | 7  | .172  | 4                    |
|          |                     | 2 | V*S*P                      | 1.440         | 1  | .230  | 3                    |
|          |                     | 3 | G*S                        | .927          | 7  | .996  | 2                    |
| 4        | Generating Class(c) |   | V*G*P, V*S*P               | 10.998        | 28 | .998  |                      |
|          | Deleted Effect      | 1 | V*G*P                      | 10.410        | 7  | .166  | 4                    |
|          |                     | 2 | V*S*P                      | 1.538         | 1  | .215  | 3                    |
| 5        | Generating Class(c) |   | V*G*P, V*S, S*P            | 12.537        | 29 | .997  |                      |
|          | Deleted Effect      | 1 | V*G*P                      | 10.410        | 7  | .166  | 3                    |
|          |                     | 2 | V*S                        | .101          | 1  | .751  | 2                    |
|          |                     | 3 | S*P                        | 2.431         | 1  | .119  | 2                    |
| 6        | Generating Class(c) |   | V*G*P, S*P                 | 12.638        | 30 | .998  |                      |
|          | Deleted Effect      | 1 | V*G*P                      | 10.410        | 7  | .166  | 3                    |
|          |                     | 2 | S*P                        | 2.331         | 1  | .127  | 2                    |
| 7        | Generating Class(c) |   | S*P, V*G, V*P, G*P         | 23.048        | 37 | .965  |                      |
|          | Deleted Effect      | 1 | S*P                        | 2.330         | 1  | .127  | 3                    |
|          |                     | 2 | V*G                        | .657          | 7  | .999  | 2                    |
|          |                     | 3 | V*P                        | 35.463        | 1  | .000  | 2                    |
|          |                     | 4 | G*P                        | 15.725        | 7  | .028  | 2                    |
| 8        | Generating Class(c) |   | S*P, V*P, G*P              | 23.705        | 44 | .995  |                      |
|          | Deleted Effect      | 1 | S*P                        | 2.331         | 1  | .127  | 2                    |
|          |                     | 2 | V*P                        | 34.806        | 1  | .000  | 2                    |
|          |                     | 3 | G*P                        | 15.069        | 7  | .035  | 2                    |
| 9        | Generating Class(c) |   | V*P, G*P, S                | 26.035        | 45 | .989  |                      |
|          | Deleted Effect      | 1 | V*P                        | 34.806        | 1  | .000  | 2                    |
|          |                     | 2 | G*P                        | 15.069        | 7  | .035  | 2                    |
|          |                     | 3 | S                          | .005          | 1  | .944  | 2                    |
| 10       | Generating Class(c) |   | V*P, G*P                   | 26.040        | 46 | .992  |                      |

a - For 'Deleted Effect', this is the change in the Chi-Square after the effect is deleted from the model.

- b - At each step, the effect with the largest significance level for the Likelihood Ratio Change is deleted, provided the significance level is larger than .050.
- c - Statistics are displayed for the best model at each step after step 0.
